# Supplementary material for: Facile and rapid synthesis of Pd nanodendrites for electrocatalysis and surface-enhanced Raman scattering applications
Source: Royal Society of Chemistry journal article supplement (doi:10.1039/c4nr02896a), 2014-08-14
Supplement: c4nr02896a1.pdf [file c4nr02896a1.pdf]

# **Facile and rapid synthesis of Pd nanodendrites for electrocatalysis and surface enhanced Raman scattering application**

Palanisamy Kannan,<sup>\*a</sup> Joanna Dolinska,<sup>a</sup> Thandavarayan Maiyalagan,<sup>b</sup> and Marcin Opallo <sup>a</sup>

<sup>a</sup> Institute of Physical Chemistry

Polish Academy of Sciences

44/52 ul. Kasprzaka, 01-224 Warsaw, Poland.

<sup>b</sup> Materials Science and Engineering Program

The University of Texas at Austin, Austin, TX 78712, USA.

\*Corresponding Author: [ktpkannan@gmail.com](mailto:ktpkannan@gmail.com) (Kannan); Phone: +48 223 433 375;  
Fax: +48 223 433 333.

## **Supporting Information**

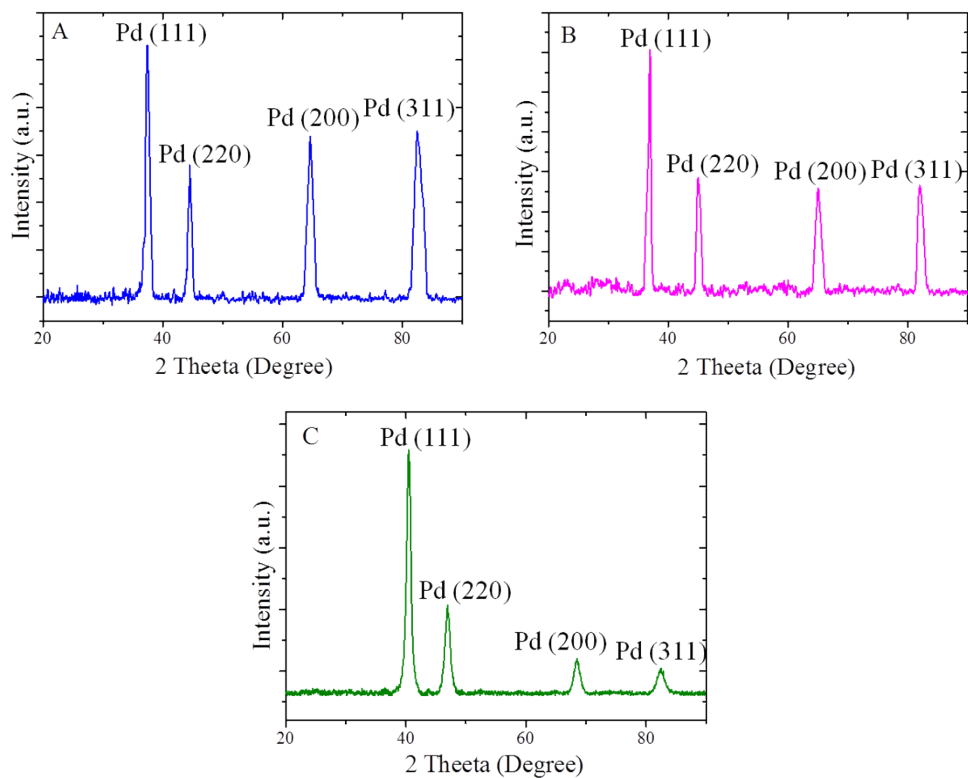

**Figure S1.** XRD pattern of as synthesized flower-like Pd dendrites nanostructures (a), big-dendrites Pd nanostructures, and small dendrite Pd nanostructures (c).

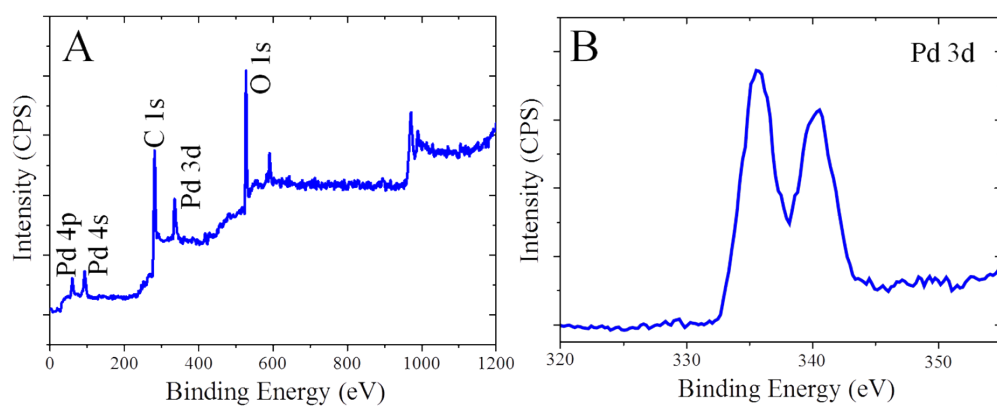

**Figure S2.** XPS of Pd survey (A) and the Pd binding energy (B) region of flower-like Pd dendrites nanoparticles.

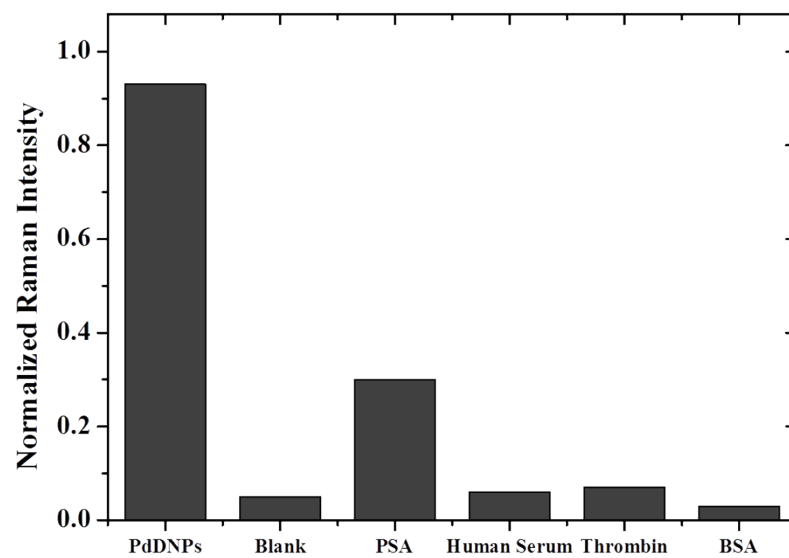

**Figure S3.** Specificity analysis of the SERS assay under in presence of 500 ng/mL human serum, thrombin and BSA on PSA A<sub>b</sub> modified flower-like Pd dendrites nanoparticles surface.

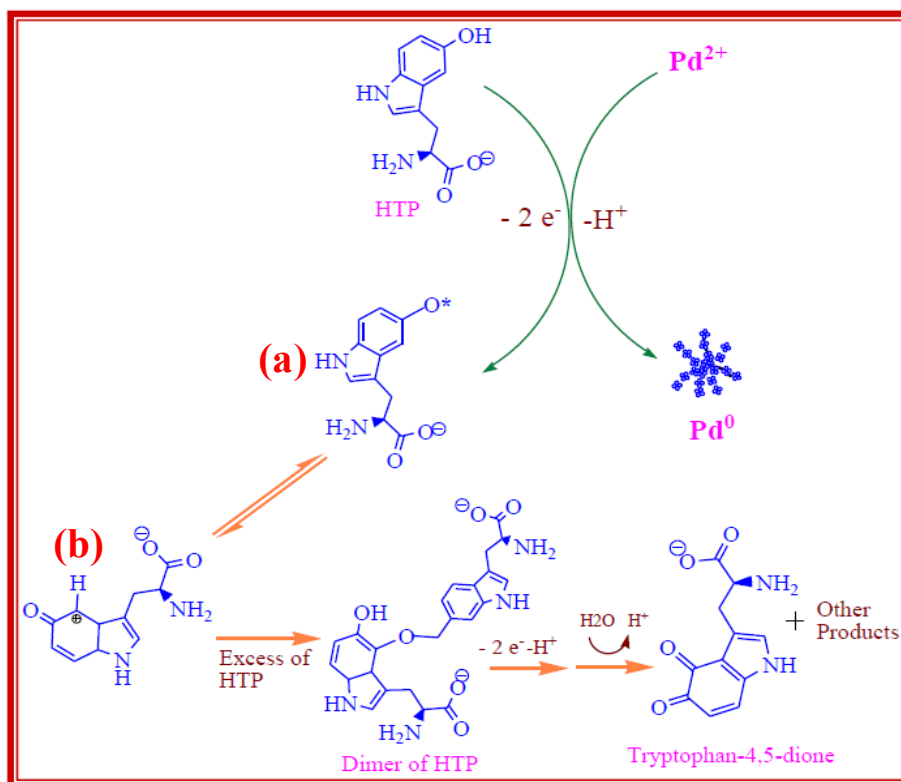

**Scheme S1.** Mechanism for HTP induced the formation of Pd dendrites nanoparticles.

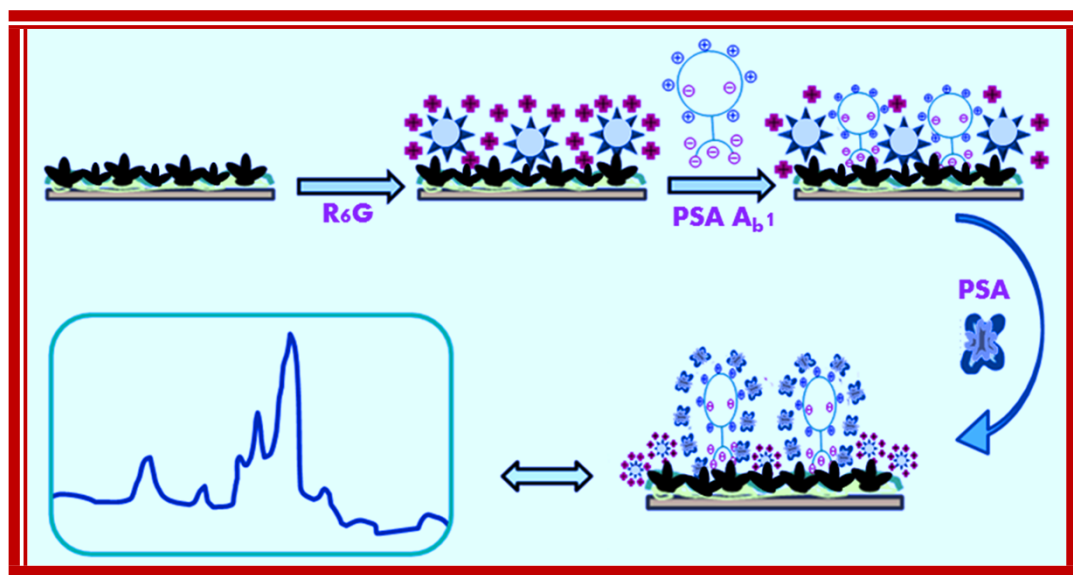

**Scheme S2.** Schematic illustration of the procedure for PSA detection according to the different amount of R6G molecules contributed to the SERS signal due to the electrostatic effects from the anchored PSA antibody on flower-like Pd dendrites nanoparticles.
